# Supplementary material for: Synthesis, Characterization and Molecular Docking of Novel Bioactive Thiazolyl-Thiazole Derivatives as Promising Cytotoxic Antitumor Drug
Source: PubMed Central journal article supplement (PMC6272888; doi:10.3390/molecules21010003), 2015-12-22
Supplement: molecules-21-00003-s001.pdf [file molecules-21-00003-s001.pdf]

# Supplementary Materials: Synthesis, Characterization and Molecular Docking of Novel Bioactive Thiazolyl-Thiazole Derivatives as promising Cytotoxic Antitumor Drug

Sobhi M. Gomha, Taher A. Salah, Huwaida M. E. Hassaneen and Mohammed A. Khedr

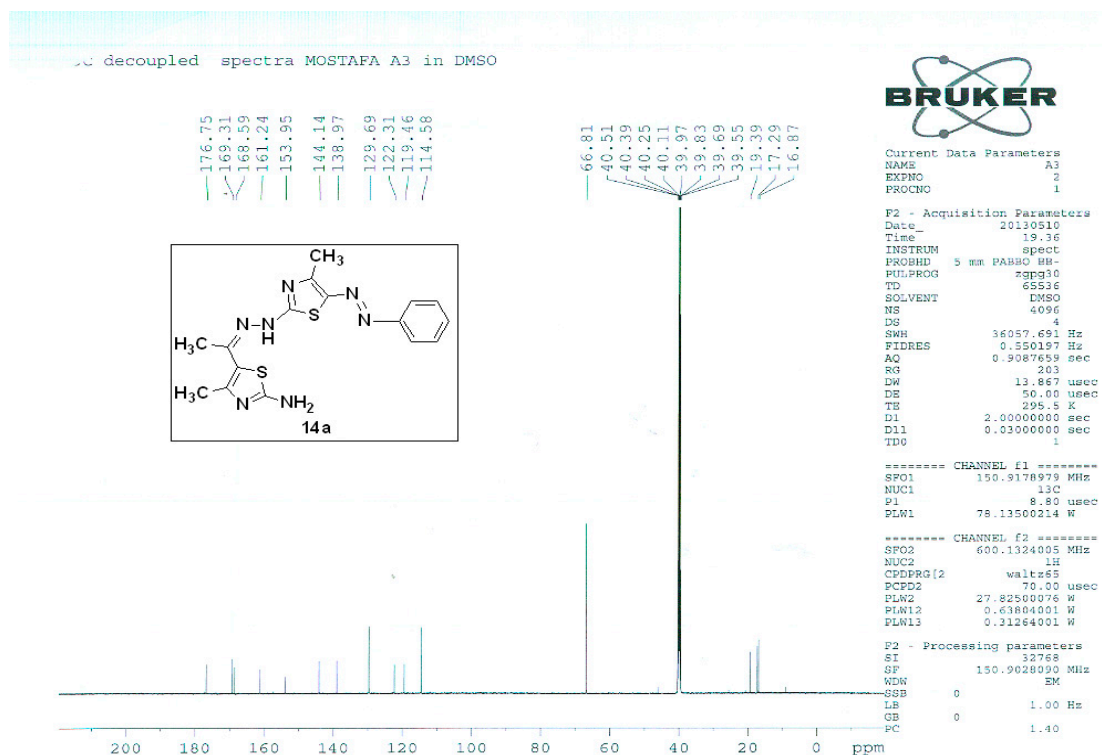

Figure S1. <sup>13</sup>C-NMR of compound 14a.

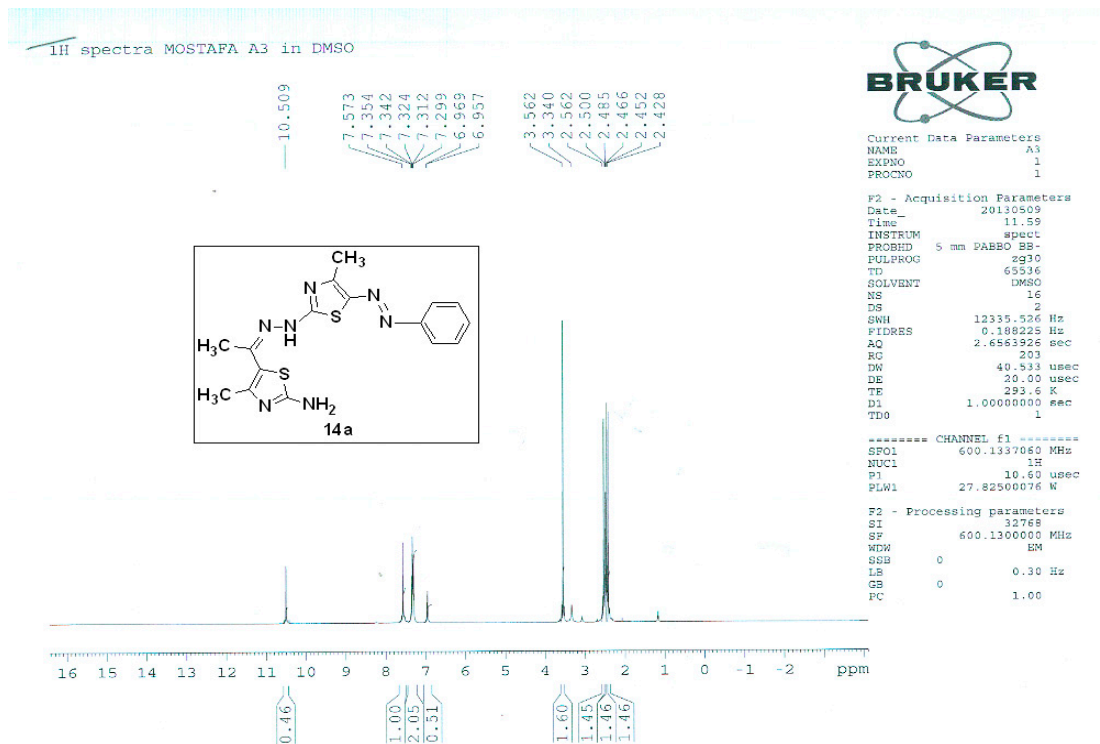

Figure S2. <sup>1</sup>H-NMR of compound 14a.

\*\*\* CLASS-5000 \*\*\* Report No. = 1 Data : A3.D03 13/02/27 10:00:49  
 Sample : Dr/ Sobhy  
 ID : A 3  
 Sample Amount : 0  
 Dilution Factor : 0  
 Type : Unknown  
 Operator :  
 Method File Name : DI.MET

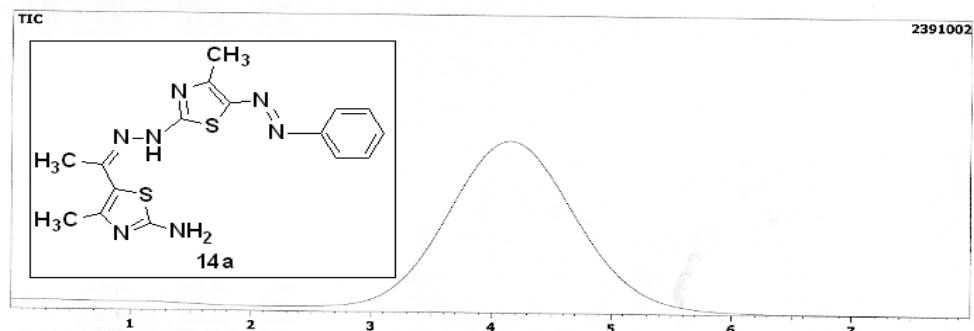

Scan # 486  
 Mass Peak # : 164 Ret. Time : 4.050  
 Base Peak : 153.30 ( 157826)

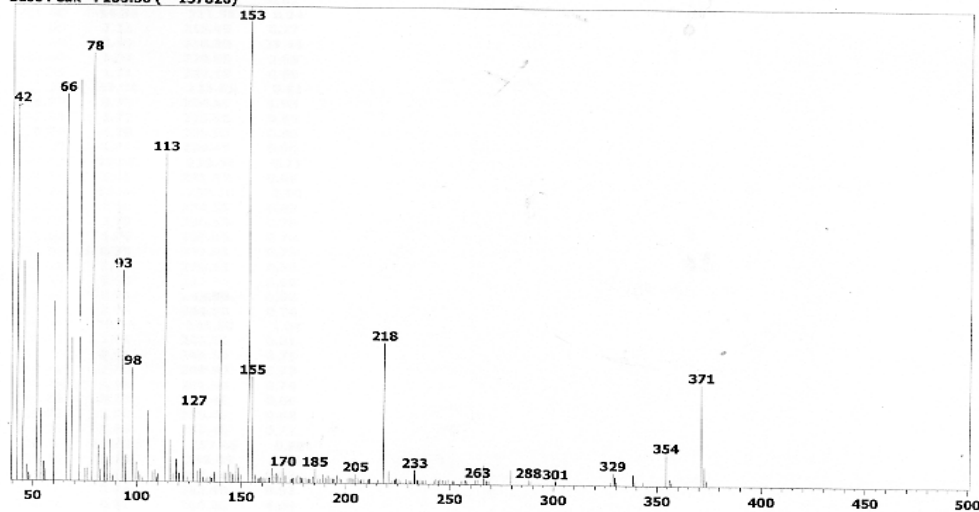

جامعة الأزهر  
 المركز الميكولوجي  
 Mycology Center-Azhar Univ  
 1-1

Figure S3. Mass of compound 14a.

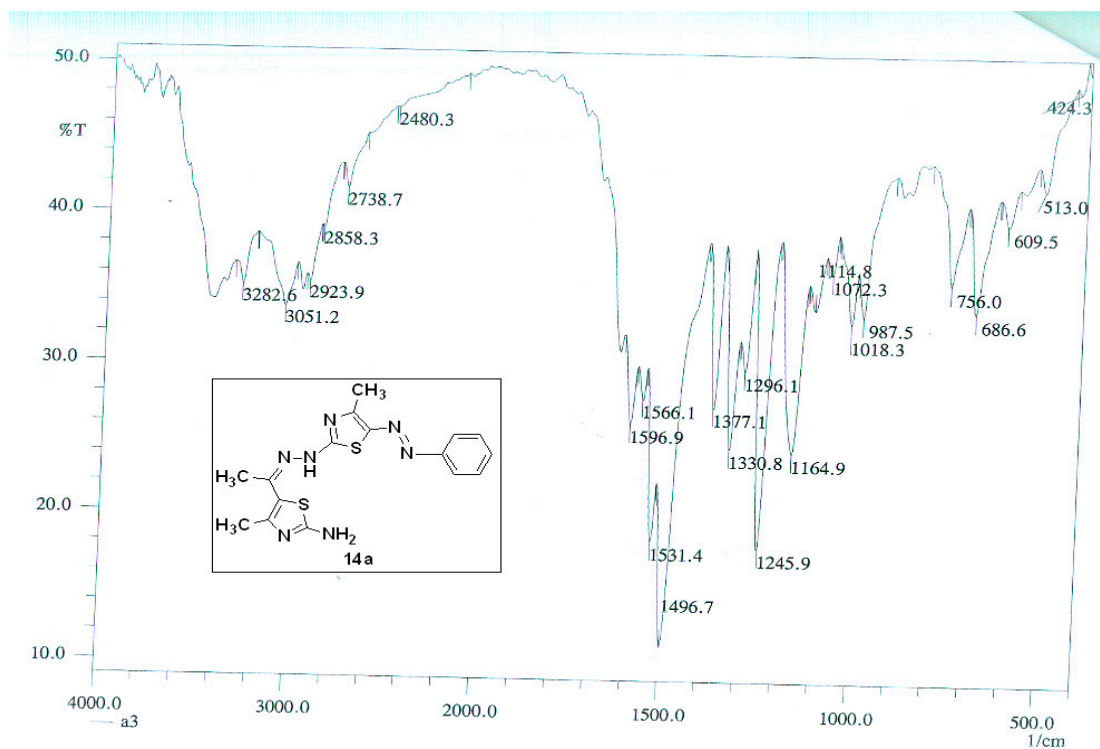

Figure S4. IR of compound 14a.

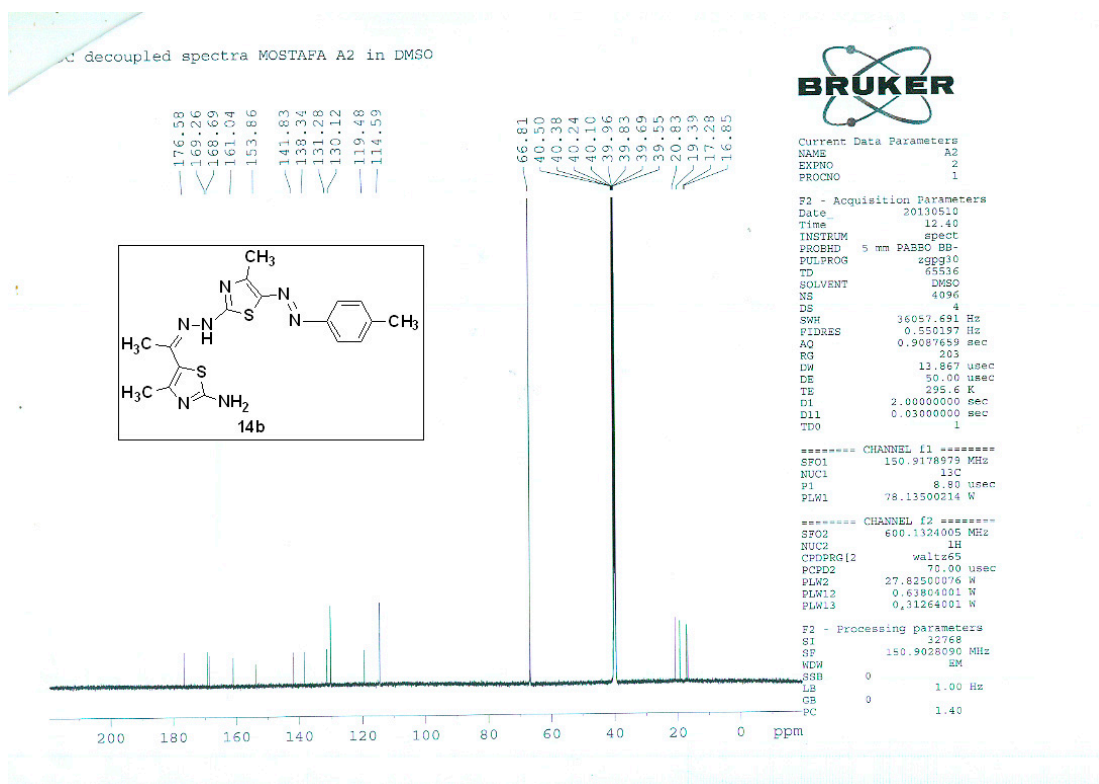

Figure S5. <sup>13</sup>C-NMR of compound 14b.

<sup>1</sup>H spectra MOSTAFA A2 in DMSO

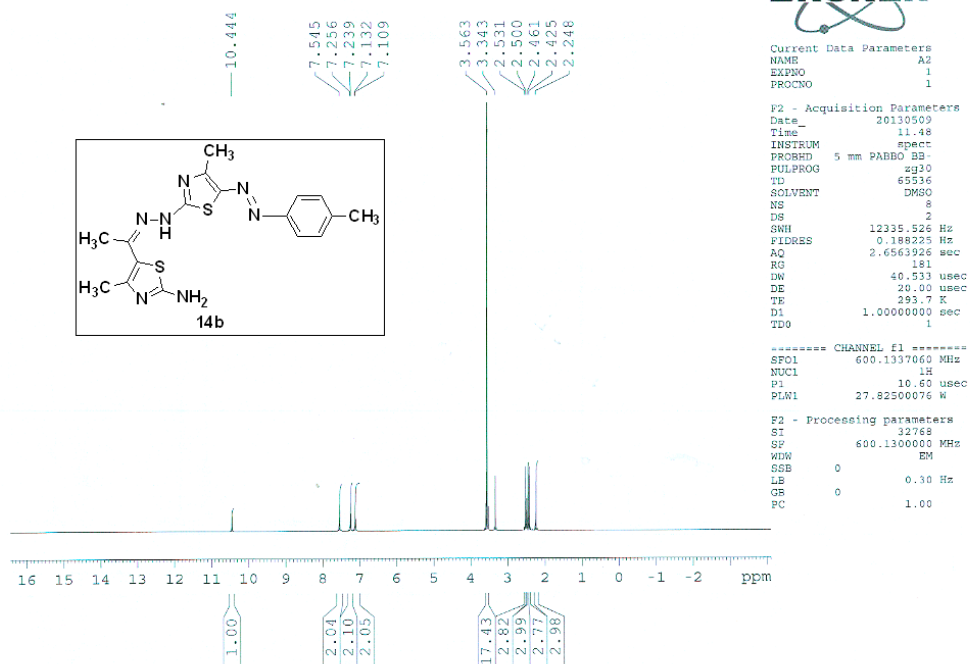

Figure S6. <sup>1</sup>H-NMR of compound 14b.

Data : A2SOBHY.D11 13/02/24 14:10:49  
 Sample : Dr/ Sobhy  
 ID : A2  
 Operator :  
 Method File Name : DI.MET

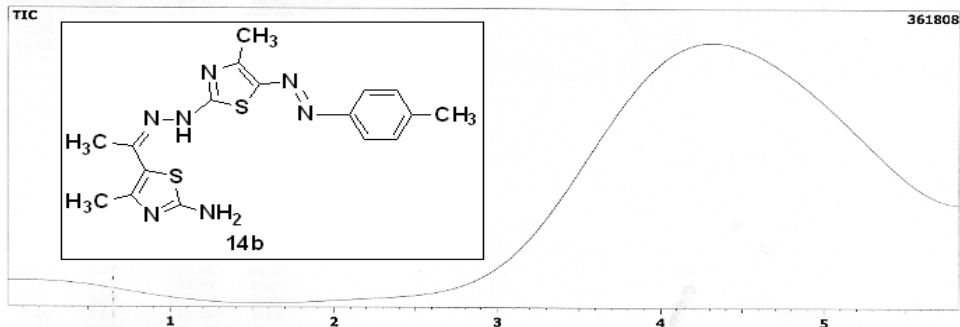

Scan # : 448  
 Mass Peak # : 58 Ret. Time : 3.733  
 Base Peak : 113.55 ( 20107)

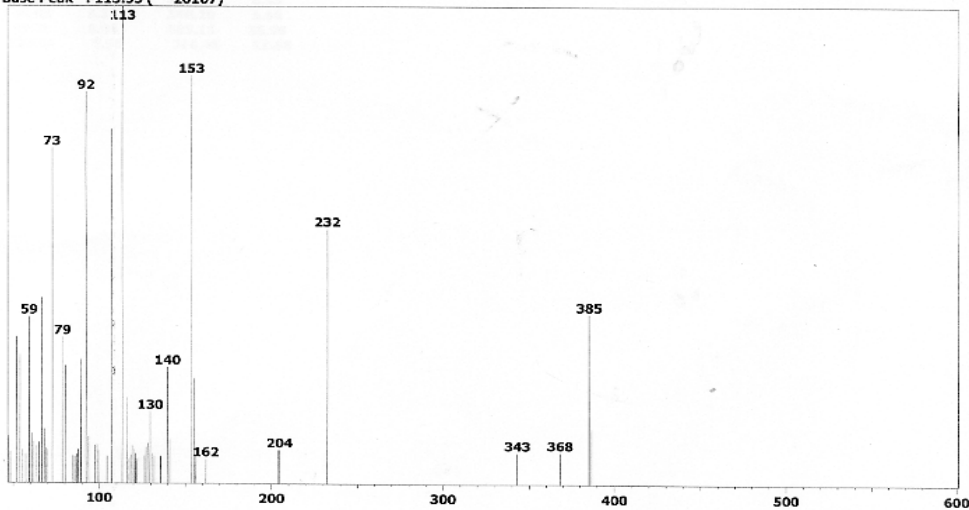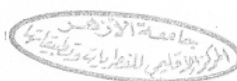

Figure S7. Mass of compound 14b.

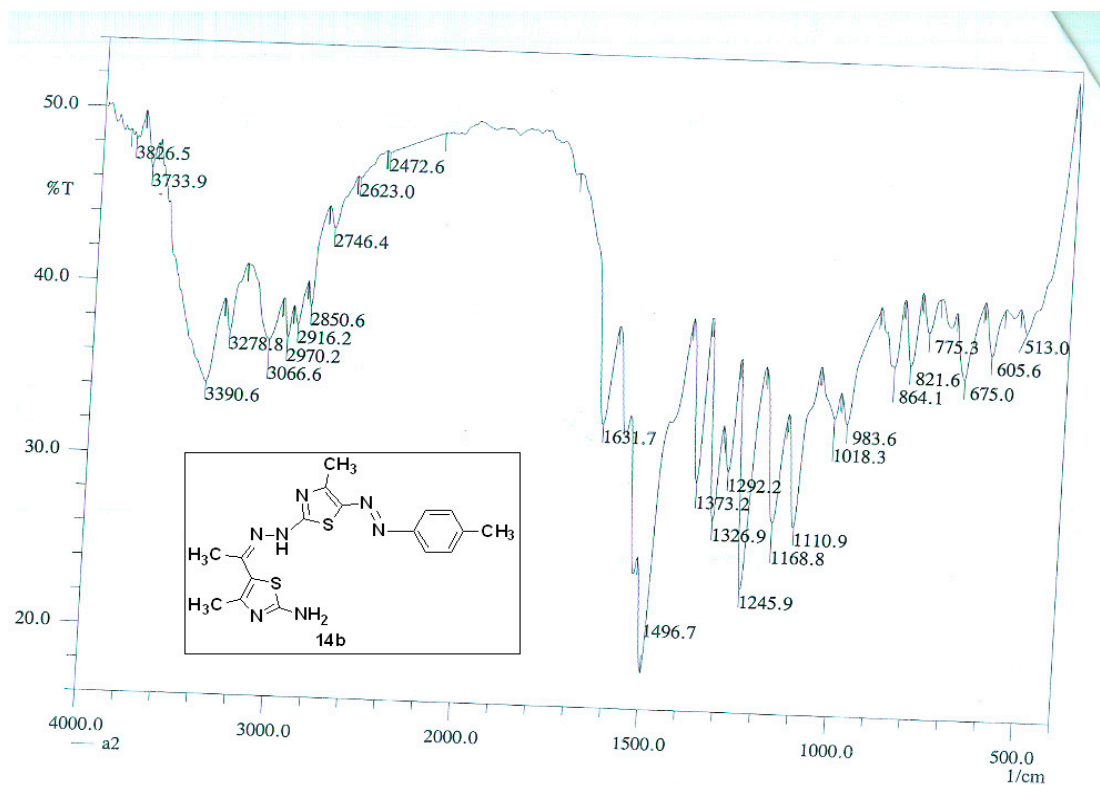

Figure S8. IR of compound 14b.

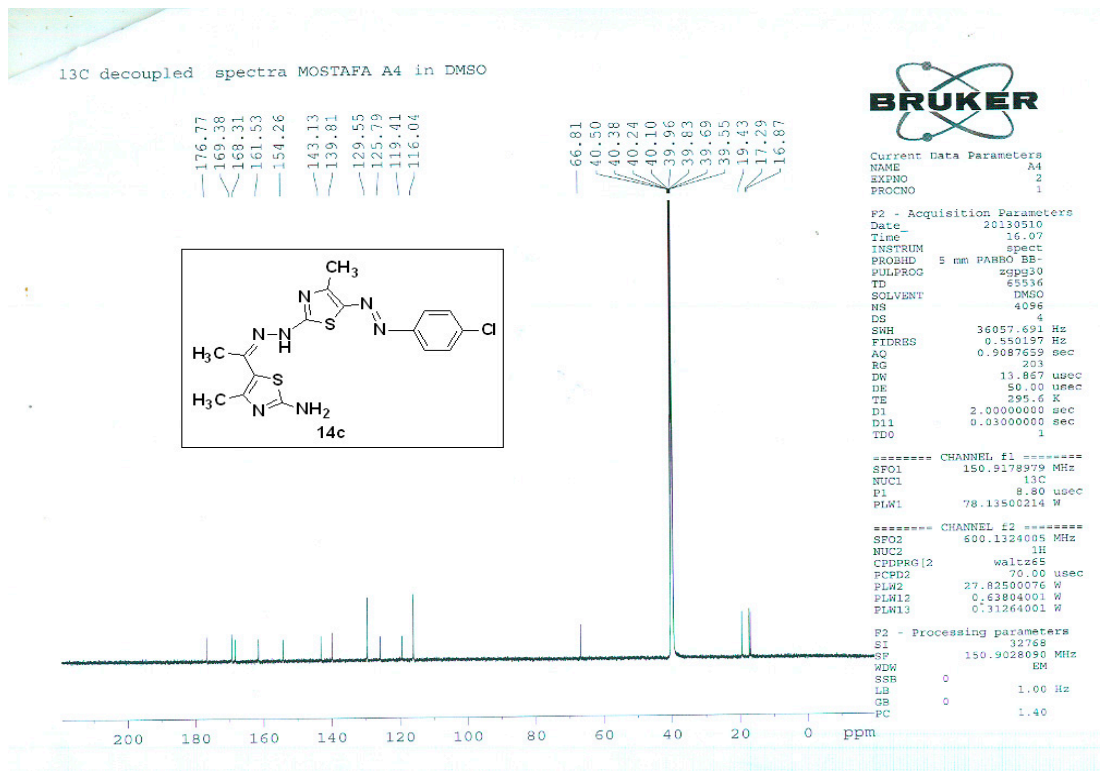

Figure S9. <sup>13</sup>C-NMR of compound 14c.

<sup>1</sup>H spectra MOSTAFA A4 in DMSO

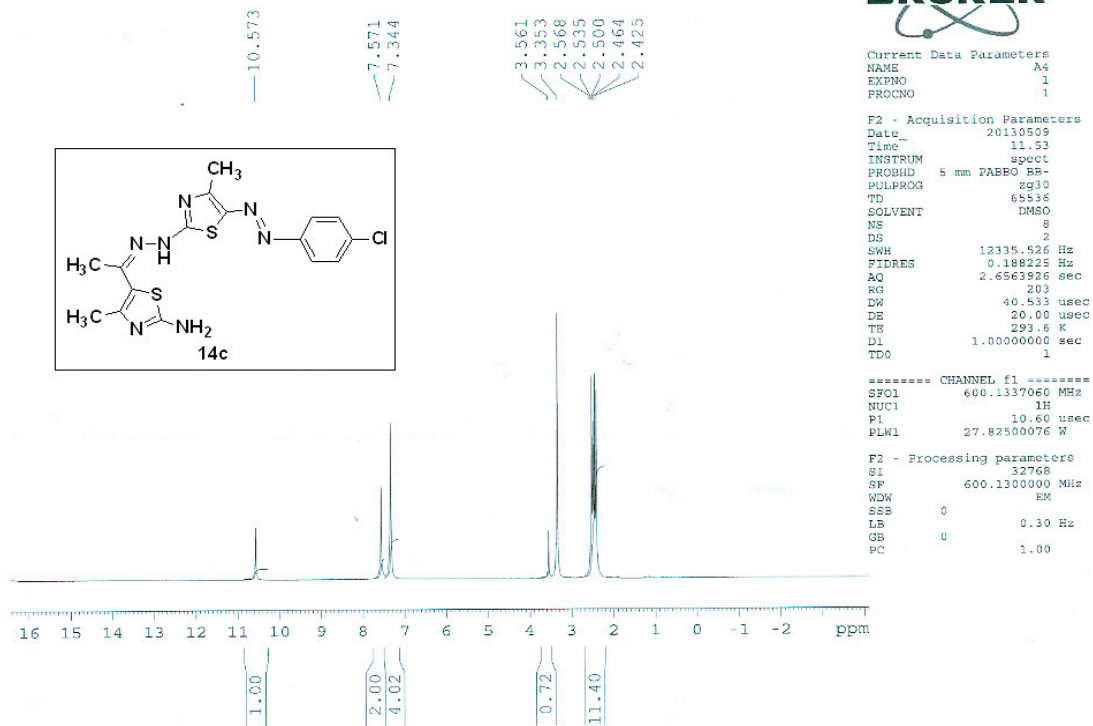

Figure S10. <sup>1</sup>H-NMR of compound 14c.



Data : A4.D03 13/C\_/27 10:31:34  
Sample : Dr/ Sobhy  
ID : A 4  
Operator :  
Method File Name : DI.MET

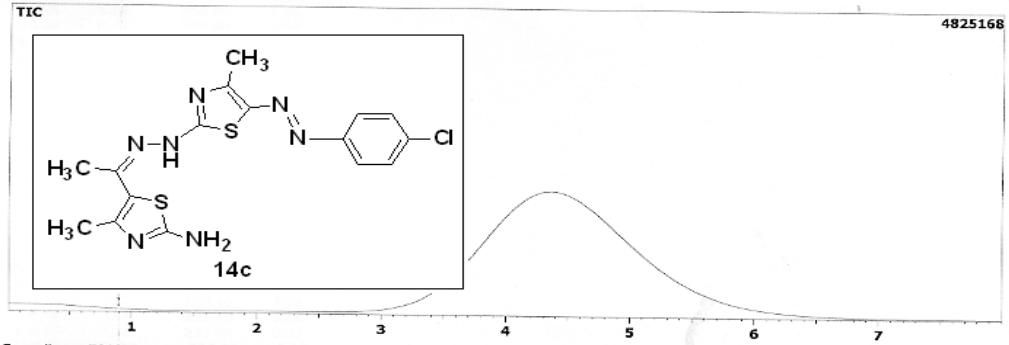

Scan # : 5221  
Mass Peak # : 174 Ret. Time : 4.350  
Base Peak : 72.45 ( 158344)

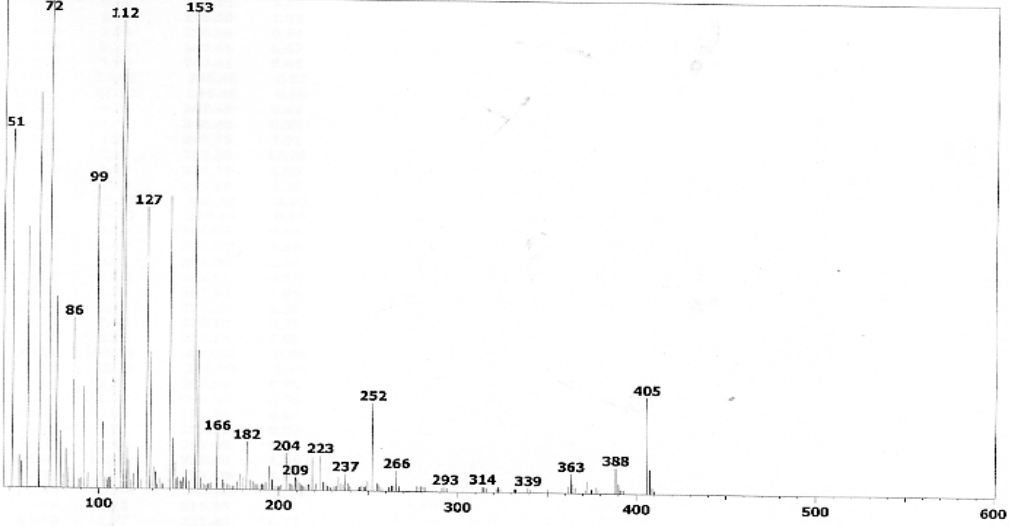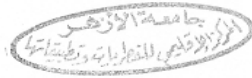

Mycology Center-Azhr Univ  
1-1

Figure S11. Mass of compound 14c.

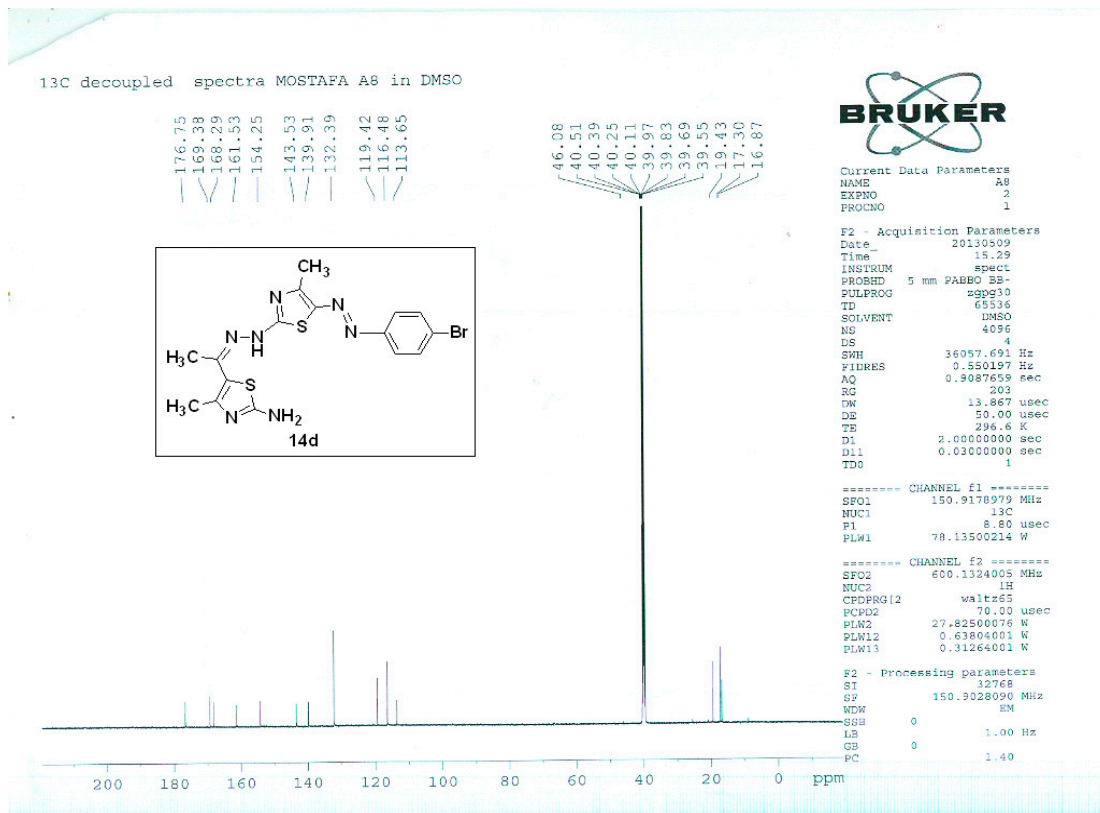

Figure S12. <sup>13</sup>C-NMR of compound 14d.

Data : AS.D03 13/02/27 10:48:15  
Sample : Dr/ Sobhy  
ID : A 8  
Operator :  
Method File Name : DI.MET

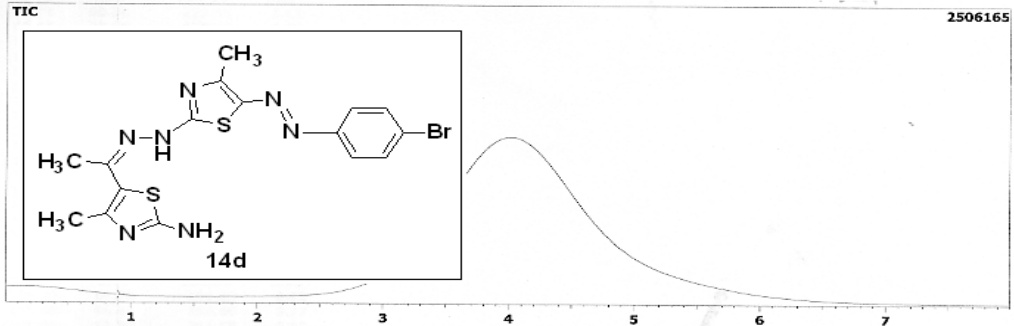

Scan # : 464  
Mass Peak # : 178 Ret. Time : 3.867  
Base Peak : 153.35 ( 142214)

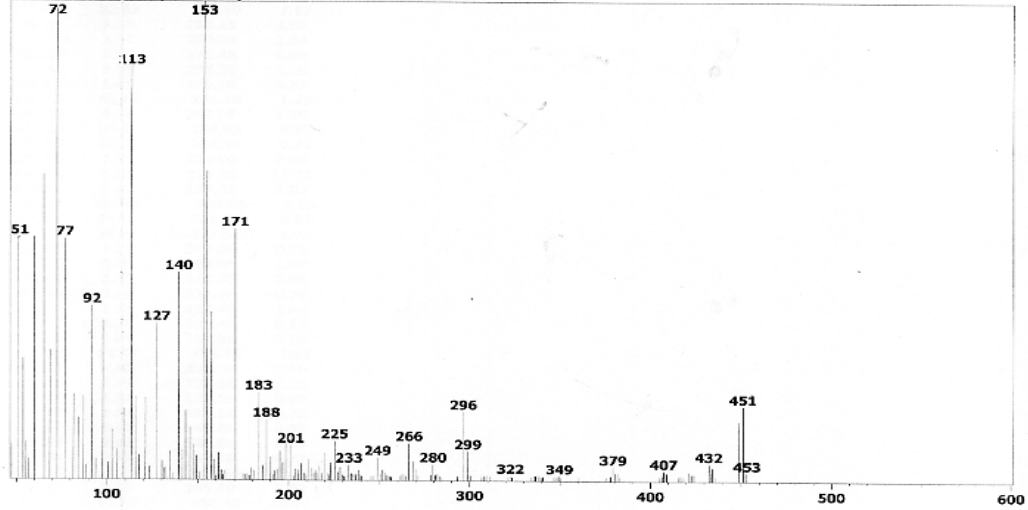

مركز البحوث الميكروبيولوجية  
Mycology Center-Azhar Univ  
1-1

Figure S13. Mass of compound 14d.

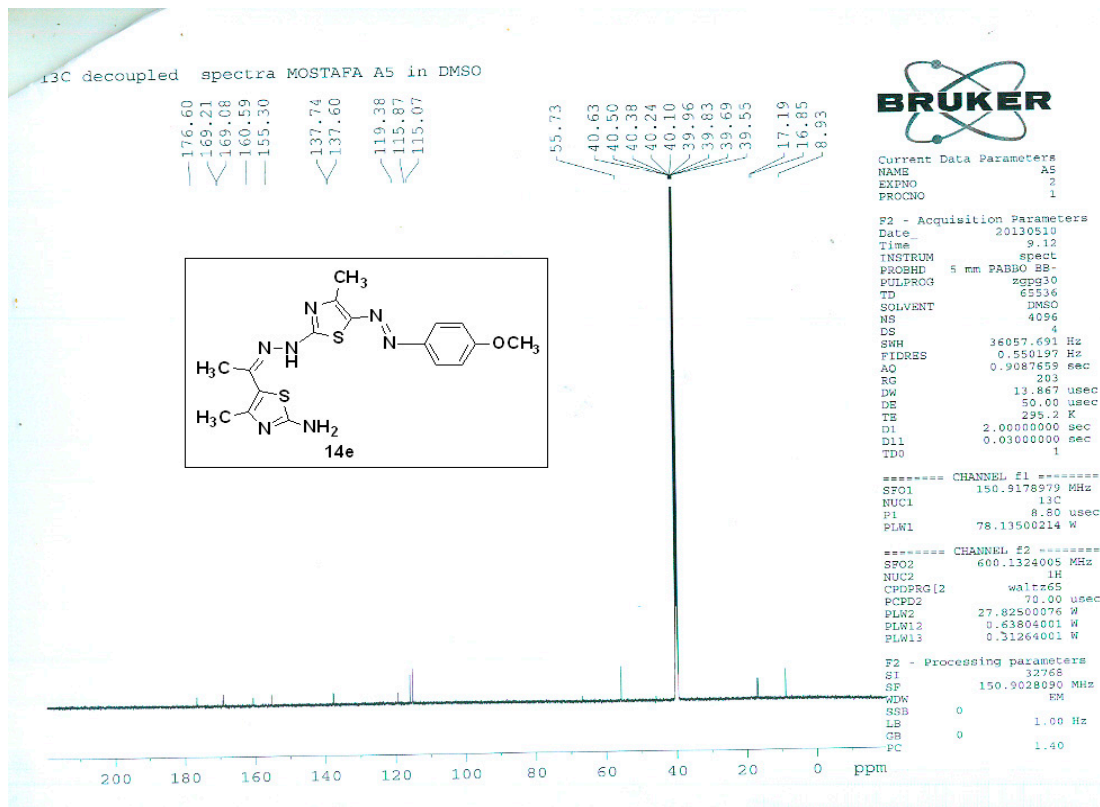

Figure S14. <sup>13</sup>C-NMR of compound 14e.

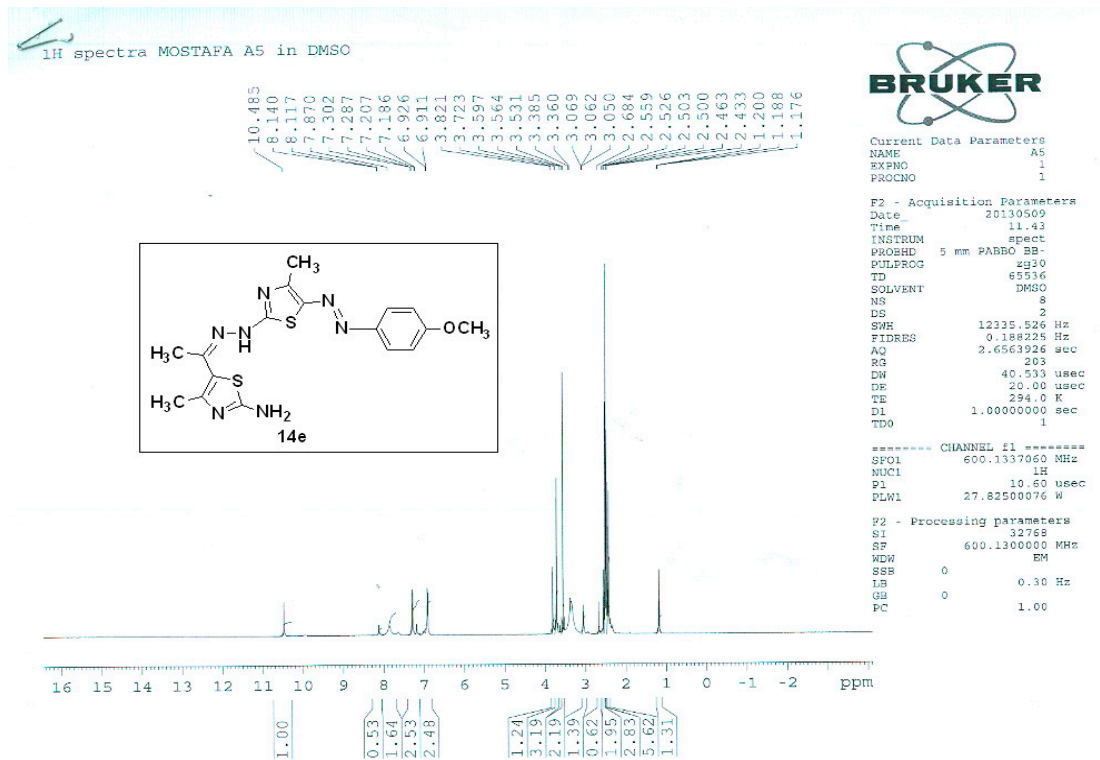

Figure S15. <sup>1</sup>H-NMR of compound 14e.

Data : A5.D03 13/02/27 10:58:05  
 Sample : Dr/ Sobhy  
 ID : A 5  
 Operator :  
 Method File Name : D1.MET

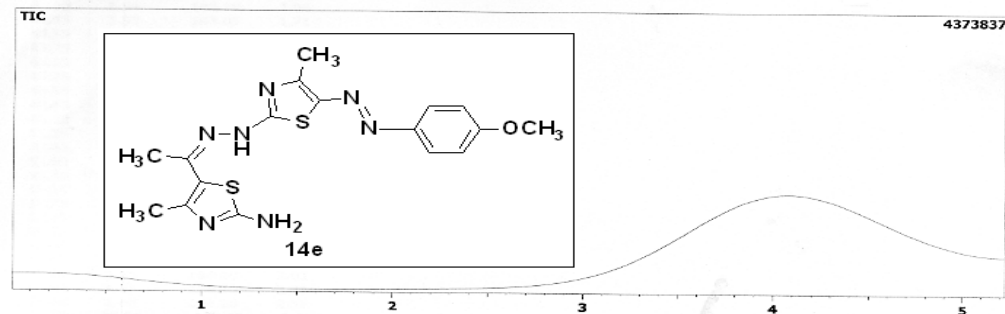

Scan # : ( 306 - 626 )  
 Mass Peak # : 178 Ret. Time : ( 2.545 - 5.216 )  
 Base Peak : 43.75 ( 67723)

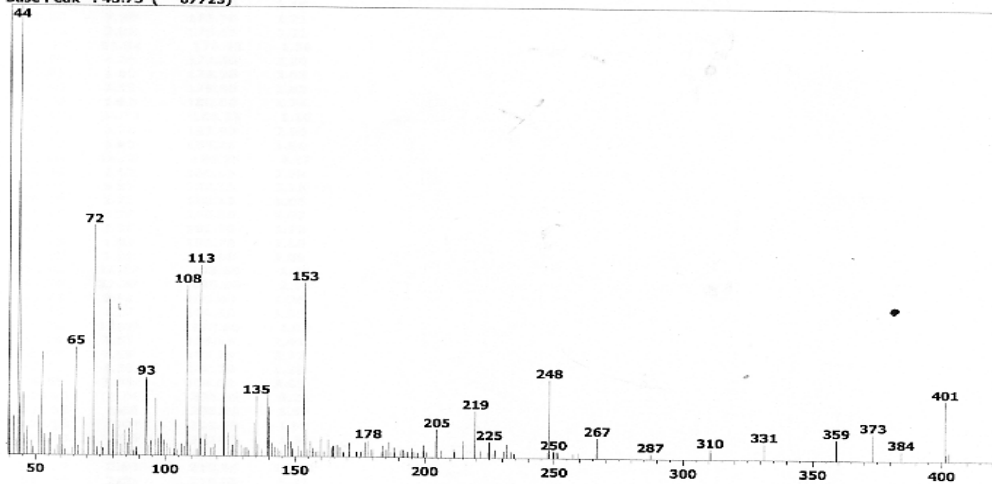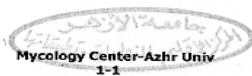

Figure S16. Mass of compound 14e.

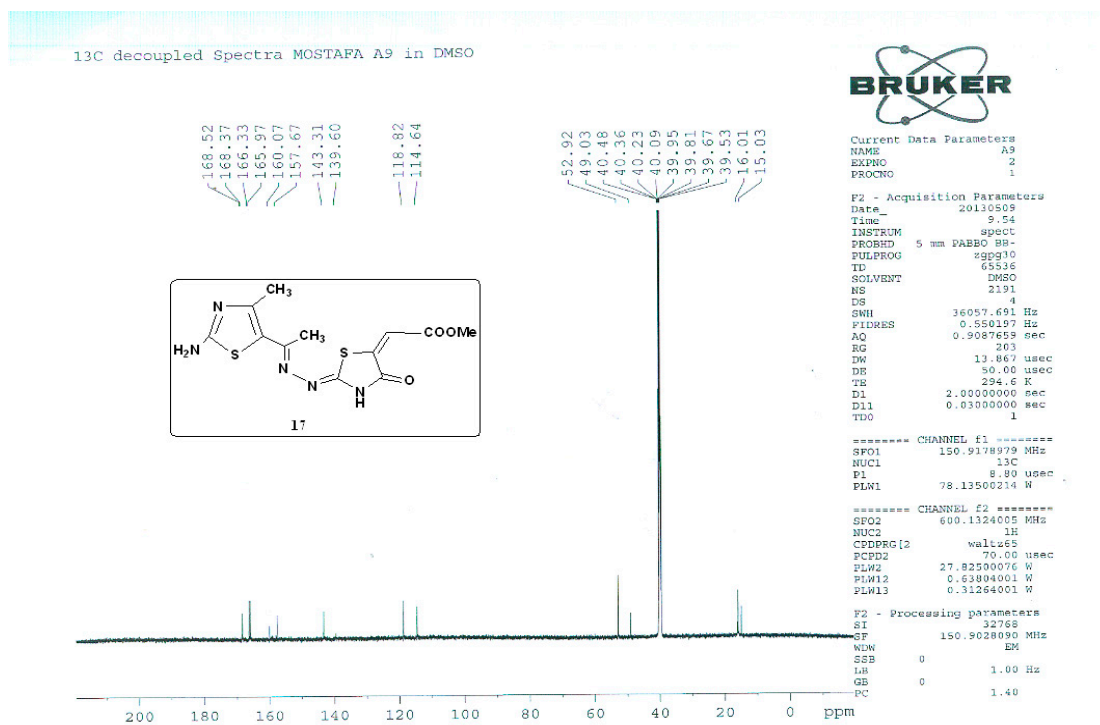

Figure S17. <sup>13</sup>C-NMR of compound 17.

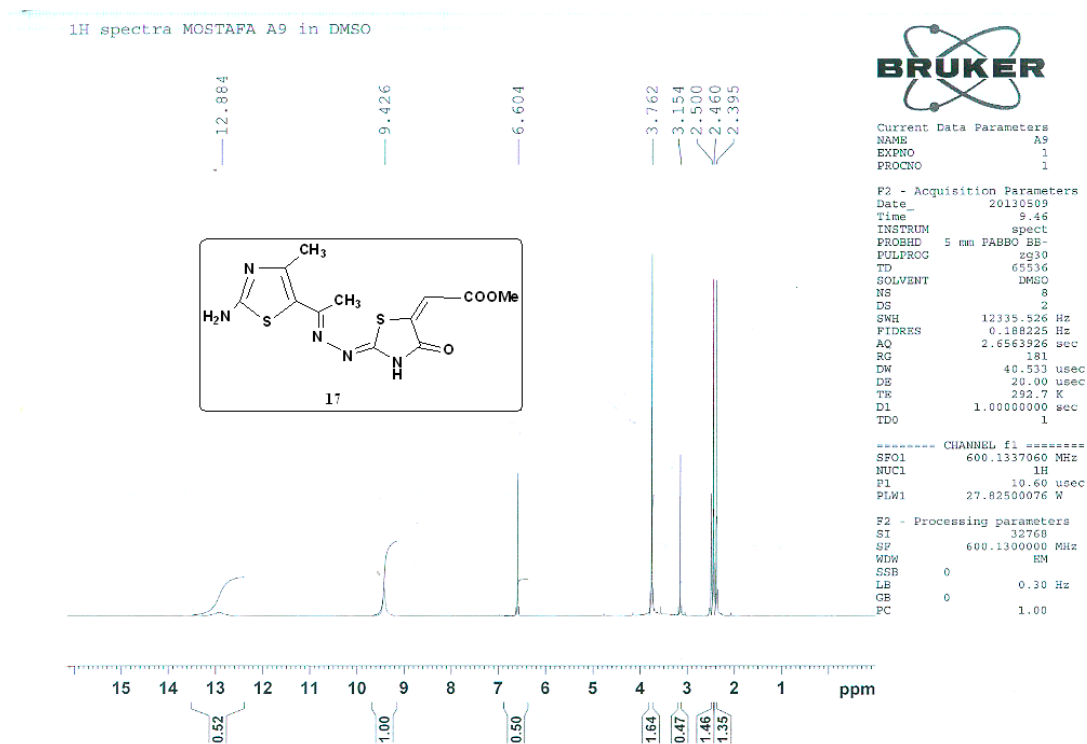

Figure S18. <sup>1</sup>H-NMR of compound 14e.

\*\*\* CLASS-5000 \*\*\* Report No. = 1 Data : A9.D03 13/02/27 10:18:13  
Sample : Dr/ Sobhy  
ID : A 9  
Sample Amount : 0  
Dilution Factor : 0  
Type : Unknown  
Operator :  
Method File Name : DI.MET

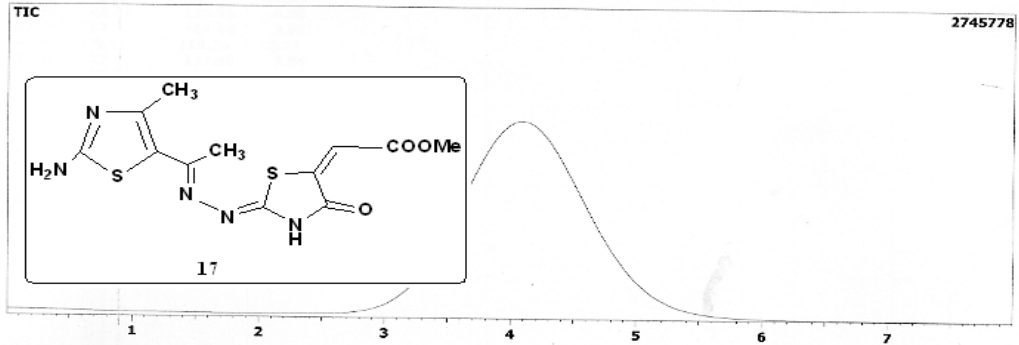

Scan # : 500  
Mass Peak # : 42 Ret. Time : 4.167  
Base Peak : 85.30 ( 150179)

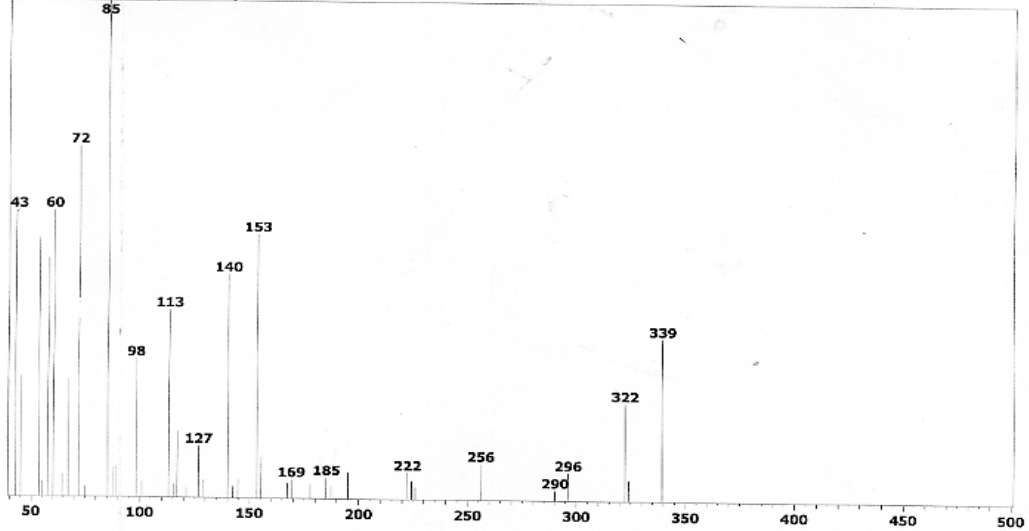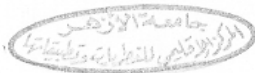

Mycology Center-Azhr Univ  
1-1

Figure S19. Mass of compound 17.

**Cairo University  
Micro Analytical Center**

**DI Analysis  
Shimadzu Qp-2010 Plus**

Sample Information  
 Analyzed by : A.GABR  
 Analyzed : 15/09/2013 01:44:16 م  
 Sample Name : A22  
 Sample ID :  
 Customer Name : صديقي محمد - علوم القاهرة  
 Data File : C:\GCMSsolution\Data\Project1\A22.QGD  
 Org Data File : C:\GCMSsolution\Data\Project1\A22.QGD  
 Method File : C:\GCMSsolution\Data\Project1\A.GABR.qgm  
 Org Method File : C:\GCMSsolution\Data\Project1\A.GABR.qgm  
 Report File :  
 Tuning File : C:\GCMSsolution\System1\Tune1\_default1.qgt  
 SEndIfSModified by : A.GABR  
 Modified : 15/09/2013 01:49:45 م

Method  
 Analytical Line 1  
 IonSourceTemp : 250.00 °C  
 [MS Table]  
 --Group 1 - Event 1--  
 Start Time : 0.00min  
 End Time : 10.00min  
 ACQ Mode : Scan  
 Event Time : 0.50sec  
 Scan Speed : 526  
 Start m/z : 50.00  
 End m/z : 300.00  
 Electron Voltage : 70 eV  
 Ionization Mode : EI

C:\GCMSsolution\Data\Project1\A22.QGD

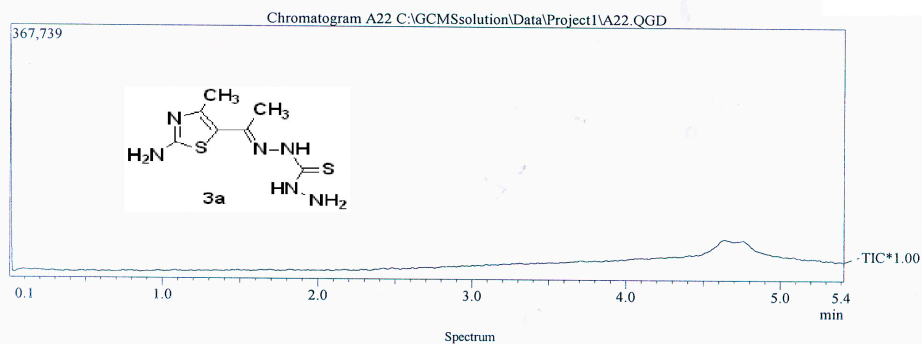

Line# 1 R.Time:3.5(Scan#:426)  
 MassPeaks:66  
 RawMode:Single 3.5(426) BasePeak:79(272)  
 BG Mode:Averaged 3.5-3.5(422-422) Group 1 - Event 1

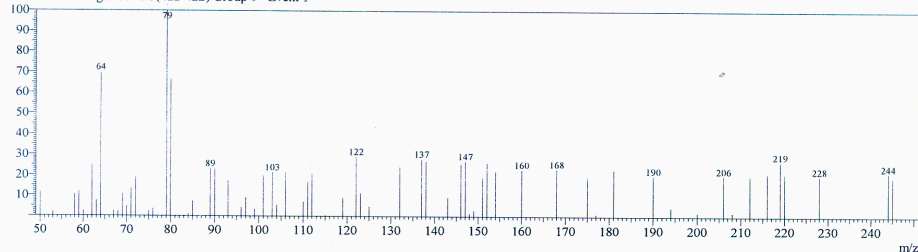

Mass Table

Line# 1 R.Time:3.5(Scan#:426)

MassPeaks:66

RawMode:Single 3.5(426) BasePeak:79(272)

BG Mode:Averaged 3.5-3.5(422-422) Group 1 - Event 1

| # | m/z   | Abs. In | Rel. Int. | # | m/z   | Abs. In | Rel. Int. | # | m/z   | Abs. In | Rel. Int. |
|---|-------|---------|-----------|---|-------|---------|-----------|---|-------|---------|-----------|
| 1 | 50.00 | 32      | 11.76     | 4 | 59.00 | 33      | 12.13     | 7 | 63.00 | 21      | 7.72      |
| 2 | 53.00 | 6       | 2.21      | 5 | 60.00 | 7       | 2.57      | 8 | 63.95 | 190     | 69.85     |
| 3 | 58.00 | 29      | 10.66     | 6 | 62.00 | 68      | 25.00     | 9 | 67.00 | 7       | 2.57      |

**Figure S20. Mass of compound 3a.**



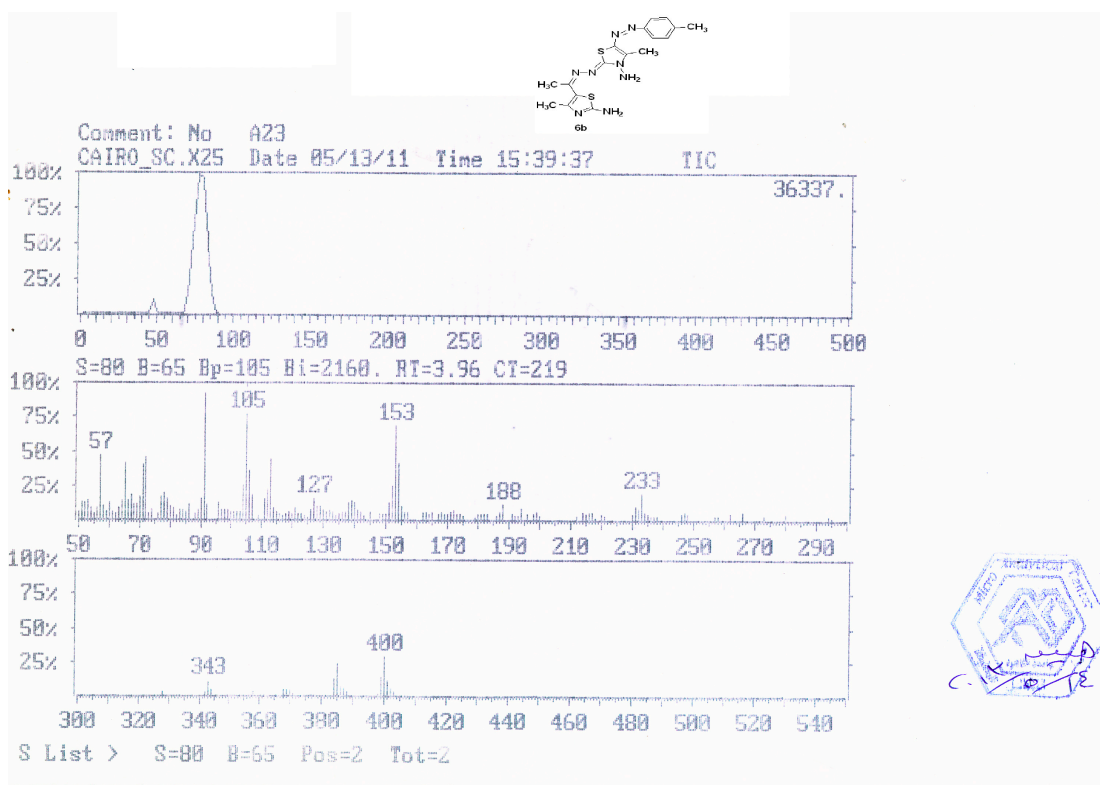

Figure S21. Mass of compound 6b

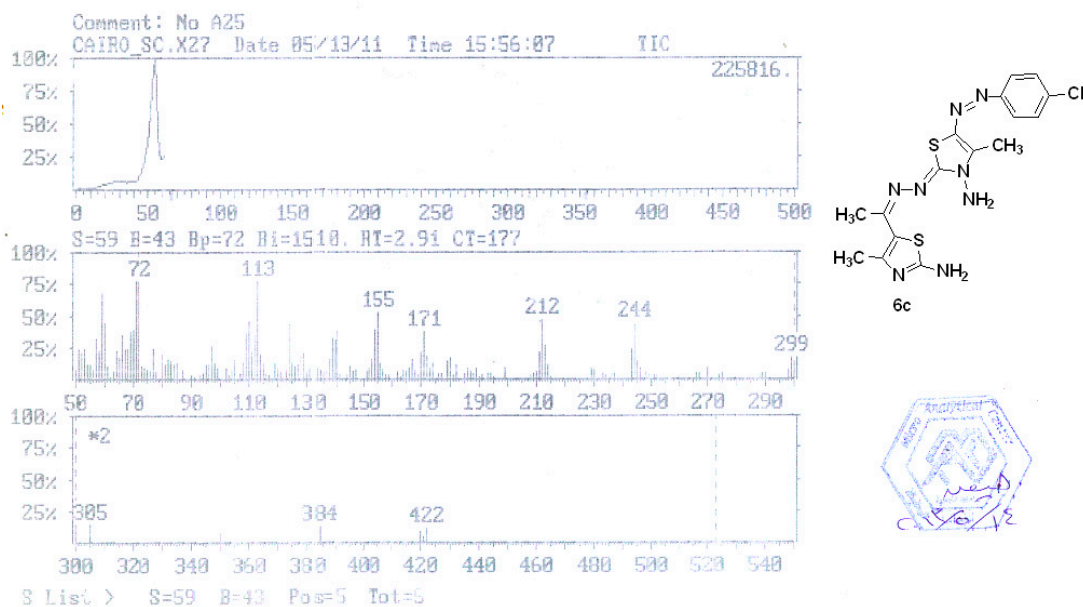

Figure S22. Mass of compound 6c.
